# Supplementary material for: In Silico Analyses and Cytotoxicity Study of Asiaticoside and Asiatic Acid from Malaysian Plant as Potential mTOR Inhibitors
Source: PubMed Central journal article supplement (PMC7504803; doi:10.3390/molecules25173991), 2020-09-02
Supplement: molecules-25-03991-s001.pdf [file molecules-25-03991-s001.pdf]

## SUPPLEMENTARY

**Table S1** The top hits from the NADI virtual screen, grouped according to the associated plants source

| PLANT                  | NADI CODE | Docking score (kcal/mol) | COMPOUND                                                                                                      |
|------------------------|-----------|--------------------------|---------------------------------------------------------------------------------------------------------------|
| Endiandra kingiana     | MSC3673   | -13.10                   | Kingianin B                                                                                                   |
|                        | MSC3676   | -12.90                   | Kingianin E                                                                                                   |
|                        | MSC3684   | -12.80                   | Kingianin M                                                                                                   |
|                        | MSC3683   | -12.80                   | Kingianin L                                                                                                   |
|                        | MSC3675   | -12.70                   | Kingianin D                                                                                                   |
|                        | MSC3678   | -12.50                   | Kingianin G                                                                                                   |
|                        | MSC3680   | -12.30                   | Kingianin I                                                                                                   |
|                        | MSC3679   | -12.20                   | Kingianin H                                                                                                   |
|                        | MSC3685   | -11.90                   | Kingianin N                                                                                                   |
|                        | MSC3681   | -11.90                   | Kingianin J                                                                                                   |
| Calophyllum inophyllum | MSC3469   | -12.50                   | Epifriedelanol                                                                                                |
|                        | MSC429    | -12.50                   | Friedelin                                                                                                     |
|                        | MSC3471   | -12.30                   | Canophyllol                                                                                                   |
|                        | MSC3485   | -12.20                   | Friedelan-3-one                                                                                               |
|                        | MSC3462   | -12.10                   | Pyranojacareubin                                                                                              |
|                        | MSC3470   | -12.00                   | Canophyllal                                                                                                   |
|                        | MSC3473   | -11.90                   | 3-oxo-Friedelan-28-oic acid                                                                                   |
|                        | MSC3472   | -11.90                   | Canophyllic acid                                                                                              |
|                        | MSC3486   | -11.90                   | Calaustralin                                                                                                  |
| Boesenbergia rotunda   | MSC2076   | -12.20                   | Panduratin F                                                                                                  |
|                        | MSC2067   | -12.20                   | Panduratin B1                                                                                                 |
|                        | MSC2068   | -12.10                   | Panduratin B2                                                                                                 |
|                        | MSC2101   | -11.90                   | Rotundol                                                                                                      |
|                        | MSC2111   | -11.90                   | (2S)-7,8-Dihydro-5-hydroxy-2-methyl-2-(4"-methyl-3"-pentenyl)-8-phenyl-2H,6H-benzo[1,2-b:5,4-b']dipyran-6-one |
|                        | MSC2075   | -11.90                   | Panduratin E                                                                                                  |
|                        | MSC513    | -12.50                   | Centellasaponin D                                                                                             |
|                        | MSC515    | -12.100                  | Sceffoleoside A                                                                                               |

|                   |         |        |                                                                          |
|-------------------|---------|--------|--------------------------------------------------------------------------|
| Centella asiatica | MSC502  | -12.00 | Madecassoside                                                            |
|                   | MSC514  | -12.00 | Asiaticoside                                                             |
|                   | MSC518  | -12.00 | 11,12-dehydrousolic acid Lactone                                         |
| Manilkara zapota  | MSC3016 | -14.60 | Lupeol benzoate                                                          |
|                   | MSC3018 | -13.00 | beta-Amyrin benzoate                                                     |
|                   | MSC3020 | -12.30 | alpha-Spinasterol benzoate/(3b,5a,22E)-Stigmasta-7,22-dien-3-ol benzoate |
|                   | MSC3017 | -12.30 | beta-Amyrin acetate                                                      |
|                   | MSC3029 | -12.10 | Lup-20(29)-en-3.23-diol                                                  |
| Psidium guajava   | MSC2125 | -12.50 | Guavacoumaric acid                                                       |
|                   | MSC2126 | -12.20 | Guavin B                                                                 |
|                   | MSC2124 | -12.20 | Ilelatifol D                                                             |
|                   | MSC2136 | -12.10 | 2alpha-Hydroxy-3beta-para-E-coumaroyloxyurs-12,18-dien-28-oic acid       |
|                   | MSC2121 | -11.90 | Jacoumaric acid                                                          |

**Table S2** Physicochemical properties of the compounds

| <b>DRUG/COMPOUND</b>                 | Everolimus | Asiaticoside | Asiatic acid |
|--------------------------------------|------------|--------------|--------------|
| MW (g/mol)                           | 958.2      | 959.12       | 488.699      |
| LogP                                 | 5.9        | 2.33         | 5.44         |
| H-Bond Donor                         | 3          | 12           | 4            |
| H-Bond Acceptor                      | 14         | 19           | 5            |
| Rotatable bond                       | 9          | 10           | 2            |
| Polar surface area (Å <sup>2</sup> ) | 204.66     | 315.21       | 97.99        |
